# Supplementary material for: Ti and Zr complexes of ferrocenyl amidinates
Source: Royal Society of Chemistry journal article supplement (doi:10.1039/c0dt00530d), 2010-01-01

## Supplementary data for:

# Ti and Zr Complexes of Ferrocenyl Amidinates

Kanwarpal Multani, Louisa J. E. Stanlake and Douglas W. Stephan\*

$^1\text{H}$  NMR spectrum of compound **1** in  $\text{C}_6\text{D}_6$

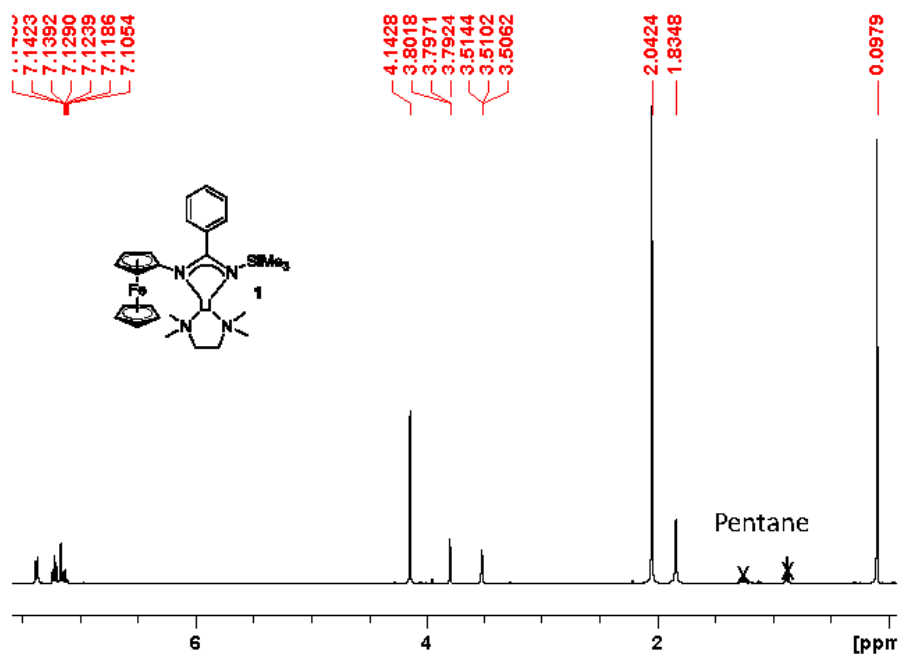

$^{13}\text{C}$  NMR spectrum of compound **1** in  $\text{C}_6\text{D}_6$

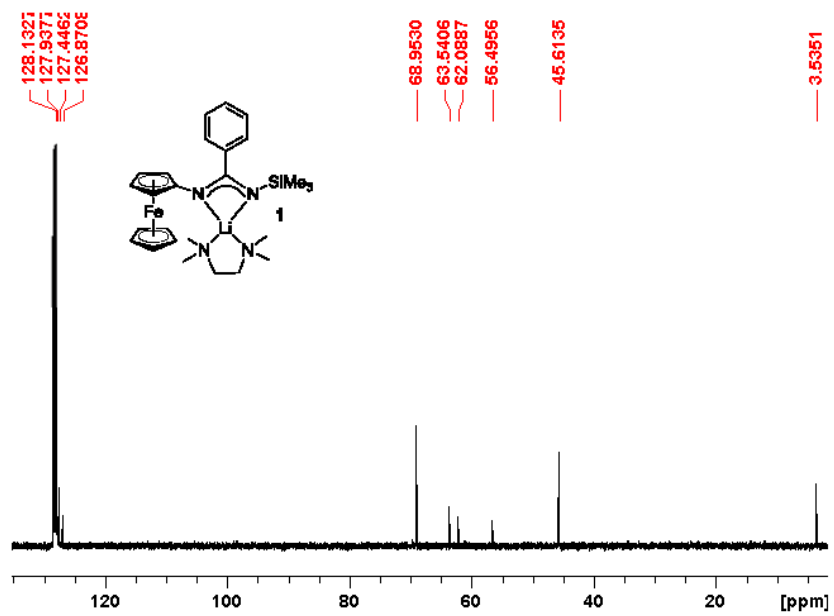



$^{13}\text{C}$  NMR spectrum of compound **2** in  $\text{C}_6\text{D}_6$

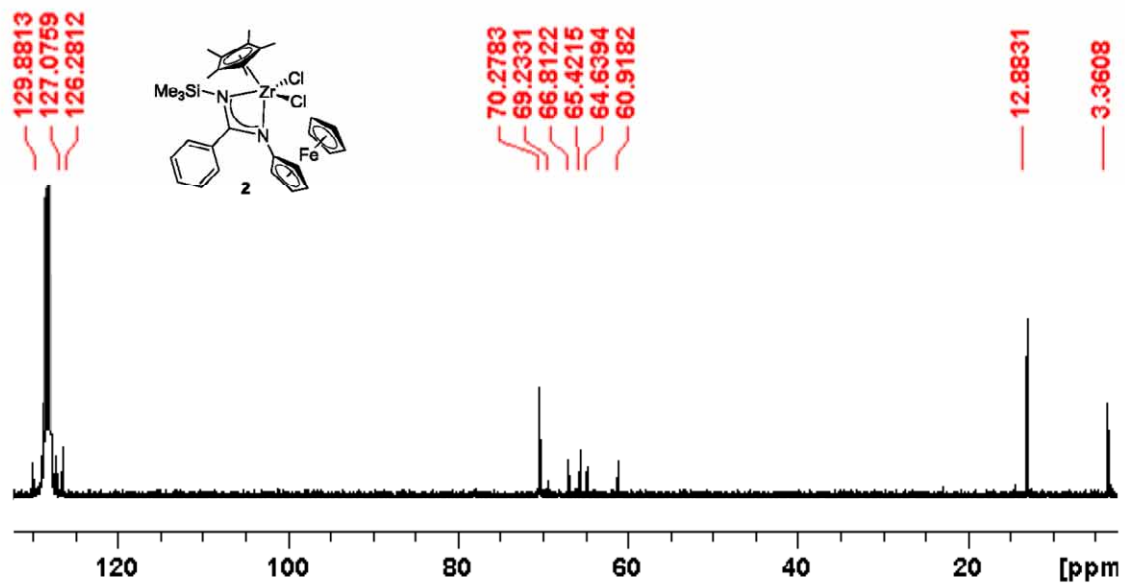

Supplement: c0dt00530d.pdf [file c0dt00530d.pdf]
